# Supplementary material
Source: publisher figshare collection journal article supplement (https://asha.figshare.com/articles/dataset/_/22056701)
Supplement: Supplementary file [file 2]

## Supplemental Material S2

### Clinical and Demographic Questionnaire (Arabic)

#### أستمارة البيانات الديموغرافية

في هذا القسم، نرجو منكم التكرم بالإجابة على بعض الأسئلة المتعلقة بالمعلومات الشخصية والاجتماعية والأسئلة الأخرى المرتبطة بحاسة السمع وبالحالة الصحية بشكل عام.

1- يرجى تزويدنا بالبريد الإلكتروني الخاص بكم \_\_\_\_\_ (قد نقوم بالتواصل معكم بخصوص التحويل الطبية

أو نتيجة السحب على الجائزة أو للمشاركة في أبحاث مستقبلية في حال موافقتكم على ذلك).

2- (اختياري): يرجى تزويدنا برقم هاتفكم: \_\_\_\_\_

3- الجنس:

أ- ذكر

ب- أنثى

ج- غير ذلك (حدد: \_\_\_\_\_).

4- العمر (حسب عيد ميلادك الأخير): \_\_\_\_\_ (مثلاً: 55 سنة)

5- هل كنت في موقف عرضك لأصوات عالية خلال الـ 24 ساعة الماضية (أصوات عالية بمستوى الأصوات في

الأعراس)؟

أ- لا

ب- نعم (في حال أخترت نعم، الرجاء الإجابة على السؤال أدناه)

1- الرجاء تحديد نوعية الأصوات العالية التي تعرضت لها خلال الـ 24 ساعة الماضية؟ \_\_\_\_\_

2- الرجاء تحديد عدد الساعات والدقائق (تقريباً) التي تعرضت فيها لهذه الأصوات خلال الـ 24 ساعة

الماضية \_\_\_\_\_ (مثلاً: 3 ساعات و 30 دقيقة)

6- هل تعتقد أن لديك مشكلة سمع حالياً؟

أ- لا

ب- نعم (في حال أخترت نعم، الرجاء الإجابة على السؤال أدناه)

1- في أي أذن تعتقد أن لديك مشكلة سمع؟

أ- اليمين

ب- اليسار

ج- الأذنين معاً

د- غير متأكد

7- هل تعتقد أن مستوى السمع لديك يتغير من يوم لآخر؟

أ- لا

ب- نعم، ويصاحبه شعور بالدوار.

ت- نعم، ولا يصاحبه شعور بالدوار

8- في حال أجبت بنعم على السؤال السابق، يرجى تزويدنا بالتفاصيل حول التغير في مستوى السمع من يوم لآخر  
(اختياري)

---

9- هل تعتقد أنك تعاني من دوّار (دوخة) بشكل مزمن حالياً؟

أ- لا

ب- نعم (الرجاء الإجابة على السؤال أدناه في حال اختيار نعم)

الرجاء تحديد في السطر الأول متى بدأت تشعر بالدوار (الدوخة) من خلال تحديد الشهر والسنة الذي بدأت فيها أعراض  
الدوخة. وعلى السطر الثاني الرجاء ذكر إن كانت الدوار (الدوخة) مرتبط بوضع صحي معين.

---

---

10- هل تعتقد أنك تعاني من الطنين حالياً؟ (الطنين هو الشعور بصوت داخلي في الأذن كالرنين أو الضجيج ولكن بدون

وجود مصدر خارجي حقيقي للصوت)

أ- نعم

ب- لا

11- هل يوجد لديك أي حالة طبية مرضية أخرى أو إحتياجات خاصة محددة؟

أ- لا

ب- نعم (الرجاء تحديد أي الحالات الطبية لديك):

---

---

---

12- هل أنت مدخن؟

أ- لا

ب- نادراً

ت- أقل من 10 سجارات في اليوم الواحد

ث- أكثر من 20 سيجارة في اليوم الواحد

13- في حال أنك مدخن، الرجاء تحديد عدد السنوات (تقريباً) التي كنت مدخناً فيها: \_\_\_\_\_ (مثلاً 8 سنوات).

14- هل يوجد لديك أحد الأقارب في العائلة لديهم مشاكل في السمع (باستثناء ضعف السمع الناتج عن التقدم بالسن).

أ- نعم (الرجاء تحديد صلة القرابة: \_\_\_\_\_)

ب- لا

ت- لا أعرف

ث- أفضل عدم الإجابة على هذا السؤال.

15- هل أصابك إلتهاب مزمن في أذنك الوسطى مؤخرًا؟

أ- لا

ب- نعم (وتم علاجها باستعمال المضادات الحيوية)

ت- نعم (وتم علاجها جراحيا عن طريق وضع أنابيب التهوية على الطبلية)

ث- نعم (تم الشفاء منها بصورة طبيعية بدون الحاجة لعلاج طبي)

ج- نعم (ما زلت أعاني من الإلتهاب حتى الآن).

16- في حال أجبت بنعم على السؤال السابق، الرجاء تحديد الأذن التي حدث فيها الإلتهاب المزمن؟

أ- الأذن اليمين

ب- الأذن اليسار

ت- الأذنتين معا

ث- لا ينطبق

17- هل خضعت لعملية جراحية في الأذن في السابق؟

أ- لا

ب- نعم (الأذن اليمين)

ت- نعم (الأذن اليسار)

ث- نعم (الأذنتين معا)

18- في حال أنك أجبت على السؤال السابق بنعم، الرجاء تحديد متى قمت بإجراء العملية على السطر الأول أدناه، وسبب

العملية على السطر الثاني:

---

---

---

19- هل قمت بتعاطي أي من الأدوية التالية في السابق لمدة زمنية طويلة نسبيا (أسابيع-أشهر)؟ (يرجى اختيار كل ما

ينطبق)

☐ الأدوية المضادة للإلتهابات (بما يشمل الأسبيرين، مسكنات الآلام العادية وخافض الحرارة).

☐ أدوية العلاج الكيميائي الخاصة بعلاج مرض السرطان

☐ مضادات الحساسية

☐ الأدوية المضادة لمرض الملاريا.

☐ الأدوية المضادة للإكتئاب

☐ الأدوية المضادة للتوتر والقلق

☐ المضادات الحيوية

□ لا شيء مما ذكر أعلاه.

20- في حال أنك قمت بأخذ أي من الأدوية المذكورة أعلاه، يرجى تحديد لكل نوع دواء قمت باختياره وتحديد المدة الزمنية التقريبية لإستخدامه (بالسنوات والأشهر) وحجم الجرعة وموعد أخذها (مثلا: يوميا أو 3 مرات أسبوعيا الخ..)

---

---

---

---

21- هل تشرب الكحول؟

أ- لا

ب- نعم (مرة واحدة شهريا أو أقل).

ت- نعم (2-4 مرات شهريا)

ث- نعم (2-3 مرات أسبوعيا)

ج- نعم (أكثر من 4 مرات أسبوعيا).

22- هل تعتقد أن لديك مشاكل في الذاكرة أو الإدراك؟

أ- لا

ب- نعم (الرجاء توضيح طبيعة هذه المشاكل باختصار: \_\_\_\_\_)

23- هل قمت بالعمل في مكان فيه ضجيج عال سابقا؟

أ- لا

ب- نعم (يرجى التأكد من إجابة سؤال 25)

24- في حال أجبت بنعم على السؤال السابق، هل كنت تستخدم سدادات حماية الأذن بشكل منتظم في مكان العمل الذي

فيه ضجيج مرتفع؟

أ- نعم

ب- لا

ت- لا ينطبق

25- في حال أجبت بنعم على سؤال 23، الرجاء تحديد طبيعة العمل الذي تعرضت فيه للضجيج المرتفع:

26- ما هي أعلى درجة تحصيل علمي لديك؟

أ- مدرسة ابتدائية

ب- مدرسة إعدادية

ت- شهادة الثانوية العامة

ث- تعليم صناعي / مهني

ج- درجة البكالوريوس الجامعية

ح- دراسات جامعية عليا (ماجستير و دكتوراة).

---
