# Supplementary material
Source: publisher figshare collection journal article supplement (https://asha.figshare.com/articles/dataset/_/22056701)
Supplement: Supplementary file [file 2]

**Supplemental Material S7**

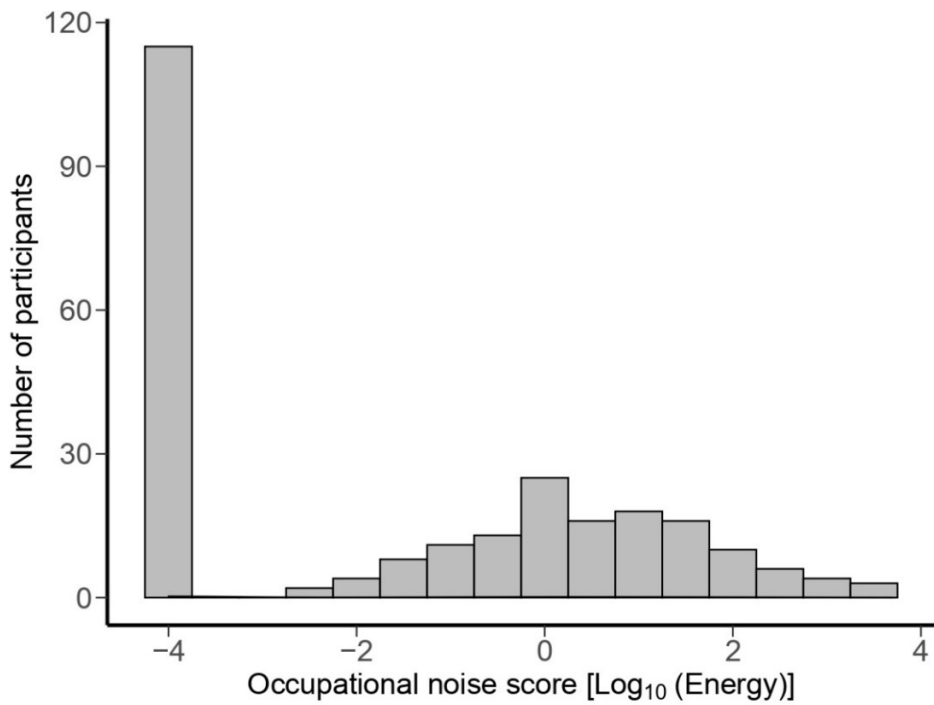

**The distribution of occupational noise exposure scores across all study participants.**
