# Supplementary material
Source: publisher figshare collection journal article supplement (https://asha.figshare.com/articles/dataset/_/22056701)
Supplement: Supplementary file [file 2]

## Supplemental Material S6

### Khalfa hyperacusis questionnaire (Arabic)

إستجواب خلفا الخاص بعرض فرط الحساسية للصوت

1. هل أنت تتعرض أو تعرضت للضوضاء ؟
2. هل تتأقلم مع الضوضاء بدرجة أقل من السنوات القليلة الماضية ؟
3. هل كان لديك يوما مشاكل في السمع ؟ إن وجد فمن أي نوع ؟

| 3        | 2        | 1    | 0  |                                                                                                                                    |
|----------|----------|------|----|------------------------------------------------------------------------------------------------------------------------------------|
| نعم كثير | نعم كثير | نعم  | لا |                                                                                                                                    |
| جدا      | نوعا ما  | قليل |    |                                                                                                                                    |
|          |          |      |    | 1. هل أنت دائما تستخدم واقيات الأذن لتقليل الإحساس بالضوضاء ؟ "لا نأخذ في الاعتبار استخدام واقيات السمع في حالات الضوضاء العاليه". |
|          |          |      |    | 2. هل تجد صعوبة في تجاهل الأصوات حولك في مواقف الحياة العادية ؟                                                                    |
|          |          |      |    | 3. هل تجد صعوبة في القراءة في الضوضاء ؟                                                                                            |
|          |          |      |    | 4. هل تجد صعوبة في التركيز في الضوضاء ؟                                                                                            |
|          |          |      |    | 5. هل تجد صعوبة في الاستماع للمحادثات في الضوضاء ؟                                                                                 |
|          |          |      |    | 6. هل هناك شخص أنت تعرفه أخبرك أنك تتأقلم مع الضوضاء أو أصوات معينة بطريقة سيئة ؟                                                  |
|          |          |      |    | 7. هل أنت حساس أو تتضايق من ضوضاء الشارع ؟                                                                                         |
|          |          |      |    | 8. هل تجد الضوضاء تضاييقك في بعض المواقف الاجتماعية ؟                                                                              |
|          |          |      |    | 9. هل إذا اقترح شخص ما فعل شيء مثلا الذهاب للسينما تبادر بالتفكير سريعا في الضوضاء التي سوف تواجهها ؟                              |
|          |          |      |    | 10. هل ترفض دعوته أو ترفض الخروج بسبب الضوضاء التي سوف تواجهها ؟                                                                   |
|          |          |      |    | 11. هل الضوضاء أو أصوات معينة تضاييقك في الأماكن الساكنة أكثر من الأماكن التي بها ضوضاء بسيطة ؟                                    |
|          |          |      |    | 12. هل الضغط العصبي والتعب يقللان من قدرتك على التركيز في الضوضاء ؟                                                                |
|          |          |      |    | 13. هل تقل قدرتك على التركيز في الضوضاء في آخر اليوم ؟                                                                             |
|          |          |      |    | 14. هل الضوضاء أو أصوات معينة تسبب لك ضغط نفسي أو تضاييقك ؟                                                                        |
