# Supplementary material
Source: publisher figshare collection journal article supplement (https://asha.figshare.com/articles/dataset/_/22056701)
Supplement: Supplementary file [file 2]

## Supplemental Material S5

### Tinnitus handicap inventory (Arabic)

إن الهدف من هذا الاستبيان هو تحديد المشاكل التي يتسبب بها طنين الأذن لديك. اختر "نعم" أو "أحياناً" أو "كلا" لكل سؤال في المكان المناسب. تركز منك ألا تتخطى أي سؤال. X تعبر وضع علامة

|                                                                                                            |                                  |                                      |                                  |
|------------------------------------------------------------------------------------------------------------|----------------------------------|--------------------------------------|----------------------------------|
| 1. هل يصعب عليك التركيز بسبب الطنين؟                                                                       | <input type="checkbox"/> نعم (4) | <input type="checkbox"/> أحياناً (2) | <input type="checkbox"/> كلا (0) |
| 2. هل يؤثر مستوى الطنين على سمعك للناس؟                                                                    | <input type="checkbox"/> نعم (4) | <input type="checkbox"/> أحياناً (2) | <input type="checkbox"/> كلا (0) |
| 3. هل تتعمر بالغضب بسبب الطنين؟                                                                            | <input type="checkbox"/> نعم (4) | <input type="checkbox"/> أحياناً (2) | <input type="checkbox"/> كلا (0) |
| 4. هل تتعمر بالأرباك بسبب الطنين؟                                                                          | <input type="checkbox"/> نعم (4) | <input type="checkbox"/> أحياناً (2) | <input type="checkbox"/> كلا (0) |
| 5. هل تتعمر باليأس بسبب الطنين؟                                                                            | <input type="checkbox"/> نعم (4) | <input type="checkbox"/> أحياناً (2) | <input type="checkbox"/> كلا (0) |
| 6. هل تتعمر كثيراً للناس حولك من الطنين؟                                                                   | <input type="checkbox"/> نعم (4) | <input type="checkbox"/> أحياناً (2) | <input type="checkbox"/> كلا (0) |
| 7. هل تعاني من صعوبة بالمقارنة ليلاً بسبب الطنين؟                                                          | <input type="checkbox"/> نعم (4) | <input type="checkbox"/> أحياناً (2) | <input type="checkbox"/> كلا (0) |
| 8. هل تتعمر أنه ليس بإمكانك الهروب من الطنين؟                                                              | <input type="checkbox"/> نعم (4) | <input type="checkbox"/> أحياناً (2) | <input type="checkbox"/> كلا (0) |
| 9. هل يجد الطنين من قدرتك على الانتماء بالأنشطة الاجتماعية مثل الخروج لتناول المشاء أو الذهاب إلى السينما؟ | <input type="checkbox"/> نعم (4) | <input type="checkbox"/> أحياناً (2) | <input type="checkbox"/> كلا (0) |
| 10. هل تتعمر بالاحباط نتيجة الطنين؟                                                                        | <input type="checkbox"/> نعم (4) | <input type="checkbox"/> أحياناً (2) | <input type="checkbox"/> كلا (0) |
| 11. هل تتعمر بأن لديك مرض خطير بسبب الطنين؟                                                                | <input type="checkbox"/> نعم (4) | <input type="checkbox"/> أحياناً (2) | <input type="checkbox"/> كلا (0) |
| 12. هل يصعب عليك الانتماء بالحياة نتيجة الطنين؟                                                            | <input type="checkbox"/> نعم (4) | <input type="checkbox"/> أحياناً (2) | <input type="checkbox"/> كلا (0) |
| 13. هل يتداخل الطنين مع عملك أو مسؤوليتك المنزلية؟                                                         | <input type="checkbox"/> نعم (4) | <input type="checkbox"/> أحياناً (2) | <input type="checkbox"/> كلا (0) |
| 14. هل تتعمر غالباً أنك سريع الانفعال بسبب الطنين؟                                                         | <input type="checkbox"/> نعم (4) | <input type="checkbox"/> أحياناً (2) | <input type="checkbox"/> كلا (0) |
| 15. هل تصعب عليك القراءة بسبب الطنين؟                                                                      | <input type="checkbox"/> نعم (4) | <input type="checkbox"/> أحياناً (2) | <input type="checkbox"/> كلا (0) |
| 16. هل يجعلك الطنين مستاءً؟                                                                                | <input type="checkbox"/> نعم (4) | <input type="checkbox"/> أحياناً (2) | <input type="checkbox"/> كلا (0) |
| 17. هل يسبب الطنين تؤثر في علاقاتك مع بقية أفراد عائلتك وأصدقائك؟                                          | <input type="checkbox"/> نعم (4) | <input type="checkbox"/> أحياناً (2) | <input type="checkbox"/> كلا (0) |
| 18. هل تجد أنه من الصعب عليك تركيز انتباهك على أمور أخرى بعيداً عن الطنين؟                                 | <input type="checkbox"/> نعم (4) | <input type="checkbox"/> أحياناً (2) | <input type="checkbox"/> كلا (0) |
| 19. هل تتعمر أنه ليس لديك أي سيطرة على الطنين؟                                                             | <input type="checkbox"/> نعم (4) | <input type="checkbox"/> أحياناً (2) | <input type="checkbox"/> كلا (0) |
| 20. هل تتعمر غالباً بالتحب بسبب الطنين؟                                                                    | <input type="checkbox"/> نعم (4) | <input type="checkbox"/> أحياناً (2) | <input type="checkbox"/> كلا (0) |
| 21. هل تتعمر بالكآبة بسبب الطنين؟                                                                          | <input type="checkbox"/> نعم (4) | <input type="checkbox"/> أحياناً (2) | <input type="checkbox"/> كلا (0) |
| 22. هل يدفعك الطنين إلى التلق؟                                                                             | <input type="checkbox"/> نعم (4) | <input type="checkbox"/> أحياناً (2) | <input type="checkbox"/> كلا (0) |
| 23. هل تتعمر بأنك لم تعد قادر على التماشي مع الطنين؟                                                       | <input type="checkbox"/> نعم (4) | <input type="checkbox"/> أحياناً (2) | <input type="checkbox"/> كلا (0) |
| 24. هل يسوء الطنين تحت الضغط؟                                                                              | <input type="checkbox"/> نعم (4) | <input type="checkbox"/> أحياناً (2) | <input type="checkbox"/> كلا (0) |
| 25. هل يشعرك الطنين بعدم الأمان؟                                                                           | <input type="checkbox"/> نعم (4) | <input type="checkbox"/> أحياناً (2) | <input type="checkbox"/> كلا (0) |
