# Supplementary material
Source: publisher figshare collection journal article supplement (https://asha.figshare.com/articles/dataset/_/22056701)
Supplement: Supplementary file [file 2]

**Supplemental Material S1.** The findings of the original multiple regression models for all primary and secondary outcome measures treating both occupational noise exposure and age as continuous predictor variables.

| Outcome variable per regression model | Predictor variables         | Adjusted $R^2$ | $F(df)$         | $p$ -value | Beta  | 95%CI of Beta |
|---------------------------------------|-----------------------------|----------------|-----------------|------------|-------|---------------|
| <b>DIN thresholds</b>                 | Occupational noise exposure | .426           | 9.052 (1,151)   | .003**     | —     | —             |
|                                       | Age                         | .426           | 22.805 (1,151)  | < .0001*** | —     | —             |
| <b>SSQ12 scores</b>                   | Occupational noise exposure | .149           | 6.915 (1, 250)  | .009**     | —     | —             |
|                                       | Age                         | .149           | 15.135 (1, 250) | < .0001*** | —     | —             |
| <b>Tinnitus presence</b>              | Occupational noise exposure | —              | —               | .045*      | 1.30  | 1.006–1.679   |
|                                       | Age                         | —              | —               | .129       | 0.979 | 0.953–1.006   |
| <b>Hyperacusis scores</b>             | Occupational noise exposure | .147           | 11.152 (1, 250) | .001**     | —     | —             |
|                                       | Age                         | .147           | 0.784 (1, 250)  | .377       | —     | —             |
| <b>THI scores</b>                     | Occupational noise exposure | .150           | 6.066 (1, 58)   | .018*      | —     | —             |
|                                       | Age                         | .150           | 0.885 (1, 58)   | .352       | —     | —             |

\* $p < .05$ . \*\* $p < .01$ . \*\*\* $p < .001$
